# Supplementary material for: SARS-CoV-2 population-based seroprevalence studies in Europe: a scoping review
Source: PubMed Central journal article supplement — BMJ Open. 2021 Apr 1;11(4):e045425. doi: 10.1136/bmjopen-2020-045425 (PMC8021754; doi:10.1136/bmjopen-2020-045425), 2021-04-01
Supplement: bmjopen-2020-045425supp001.pdf [file bmjopen-2020-045425supp001.pdf]

**SARS-CoV-2 population-based seroprevalence studies in Europe: A scoping review****Supplementary Material**

Search strategy:

MedRxiv/BioRxiv

Full text or abstract or title "((COVID-19) OR (sars-cov-2)) AND ((seroprevalence)" (match whole all) and posted between "01 Jan, 2020 and 15 Sep, 2020"

NCBI PubMed

(((((COVID-19[Text Word]) OR (sars-cov-2[Text Word])) AND (seroprevalence[Text Word]) AND ("2020/01/01"[Date - Publication] : "2020/09/15"[Date - Publication])))
